# Supplementary material
Source: PubMed Central journal article supplement (PMC7186781)
Supplement: supplemental_tables_ioaa007.pdf [file supplemental_tables_ioaa007.pdf]

Supplemental TABLE 1. Antibodies

| Antibodies         | Source                          | Dilution (WB/ChIP)             |
|--------------------|---------------------------------|--------------------------------|
| Primary antibodies |                                 |                                |
| H3K27ac            | Rabbit (ab4729, Abcam)          | 1:1000 (WB),<br>1 µg/µl (ChIP) |
| H3K9ac             | Rabbit (ab4441, Abcam)          | 1 µg/µl (ChIP)                 |
| H3K9ac             | Rabbit (9649S, Cell Signaling)  | 1:1000 (WB)                    |
| H3K4me3            | Rabbit (9751S, Cell Signaling)  | 1:1000                         |
| H3                 | Rabbit (9715S, Cell Signaling)  | 1:1000                         |
| H3K27me3           | Rabbit (9733S, Cell Signaling)  | 1:1000                         |
| H3K9me3            | Rabbit (13969S, Cell Signaling) | 1:1000                         |
| H3K9me3            | Rabbit (ab8898, Abcam)          | 1 µg/µl (ChIP)                 |
| Secondary antibody |                                 |                                |
| Anti-Rabbit        | 170-6515, Bio Rad               | 1:5000                         |

Supplemental TABLE 2. ChIP -PCR Primers.

| ChIP Primers               | Sequence               |
|----------------------------|------------------------|
| <b>Upregulated genes</b>   |                        |
| SERPINA5 fwd               | CCTGGGGAAGGAGAGGGAGA   |
| SERPINA5 rev               | CCCGGTGGTCTCAGCCATAC   |
| HSD3B1 fwd                 | GGGGCACAAGGGATTTTGT    |
| HSD3B1 rev                 | CGATGCTGGAGAGGCCACA    |
| HSD17B14 fwd               | CTGGGGTCGTGGATTTCTGG   |
| HSD17B14 rev               | CCTCTTCCCTCAGGCCAGT    |
| CLTA4 fwd                  | GAGGGCCAGCAGCTAAAGCA   |
| CLTA4 rev                  | GCGCAGGAGTCCCCCTAAGT   |
| SPP1 fwd                   | GCTGTTGACTTCAGTGTTTTCG |
| SPP1 rev                   | GTCTCCATTTTCCAATGTGC   |
| OXTR fwd                   | CTGTGGGTTCTGGGGAGTAA   |
| OXTR rev                   | TCCACTGAAGGAGAGGGAGA   |
| <b>Downregulated genes</b> |                        |
| TNK1 fwd                   | CACTACCCAGCGGCCAGACT   |
| TNK1 rev                   | AGCCAAGGCCAGAGCAGAGA   |

|           |                      |
|-----------|----------------------|
| LIPG fwd  | GTTCTGGCGTCAGCGAAGGT |
| LIPG rev  | GCTCCCGGCGAGGTACTTTT |
| HEY2 fwd  | TGTACCAGCGGTTCGTTGGA |
| HEY2 rev  | GAGCGCCCACCACTCAAAG  |
| NDRG4 fwd | GTGACTGGCACCCCTCCTG  |
| NDRG4 rev | GGACAGTGGGGTCTGGAGGA |
