# Supplementary material
Source: PubMed Central journal article supplement (PMC7186781)
Supplement: supplementary_figure_1_ioaa007.pdf [file supplementary_figure_1_ioaa007.pdf]

**Supplemental Fig.1**

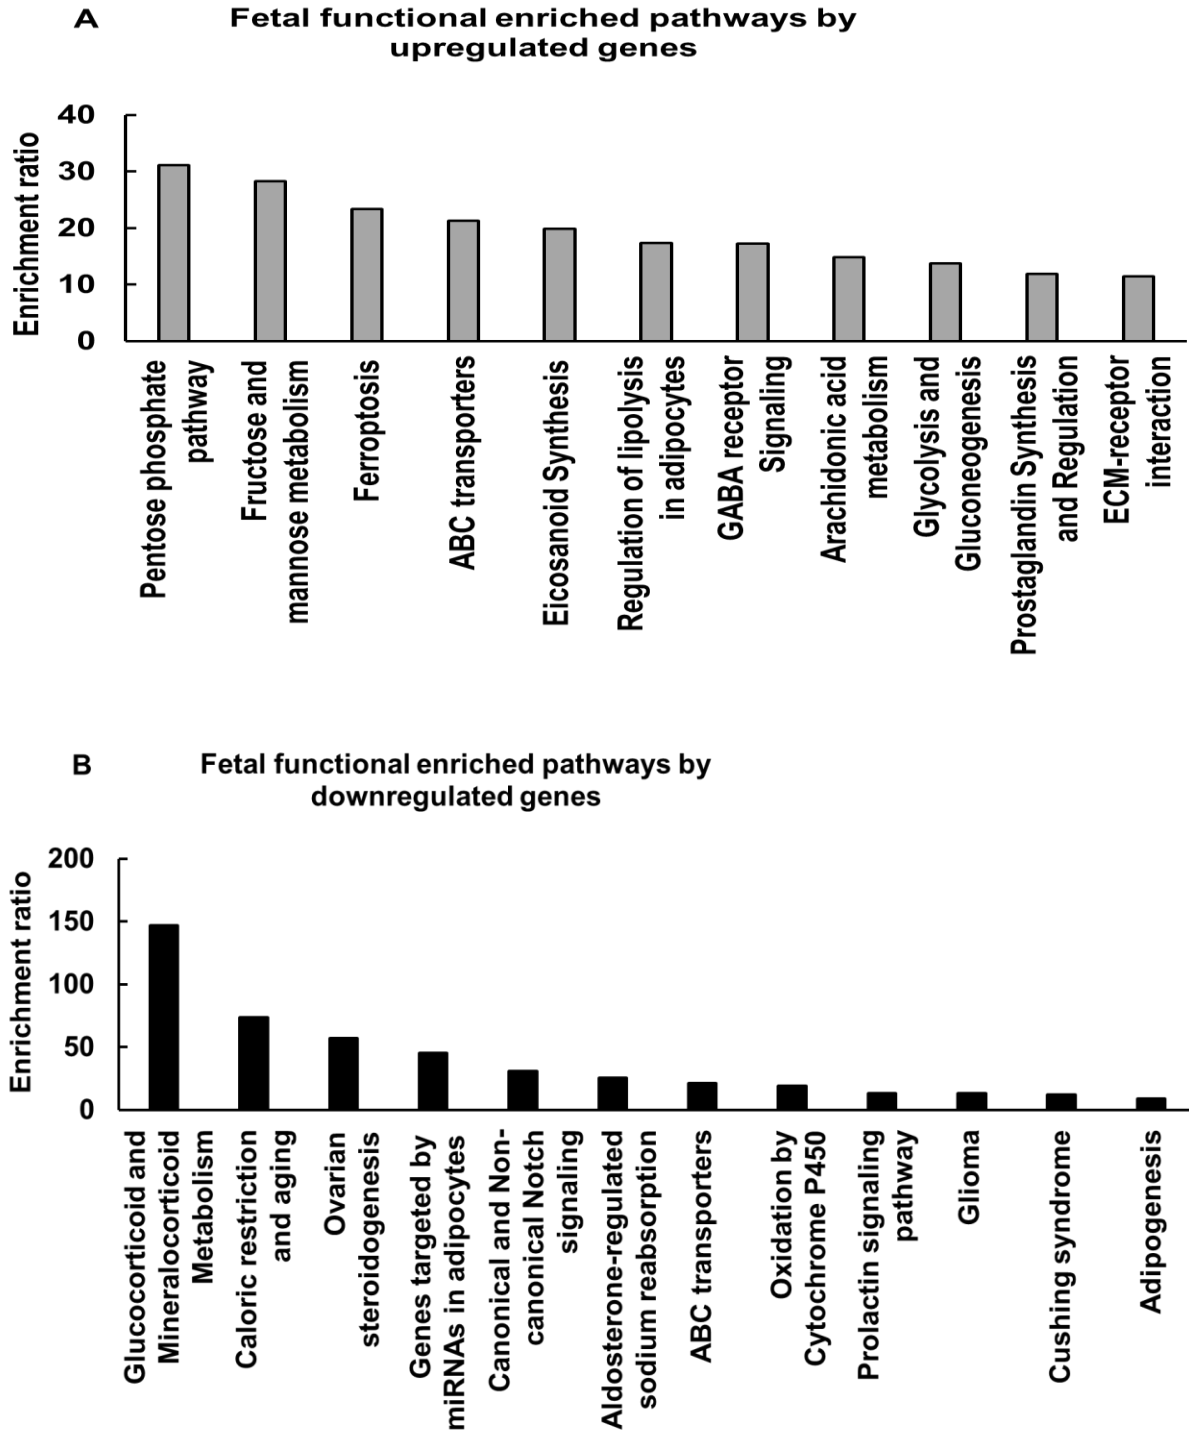

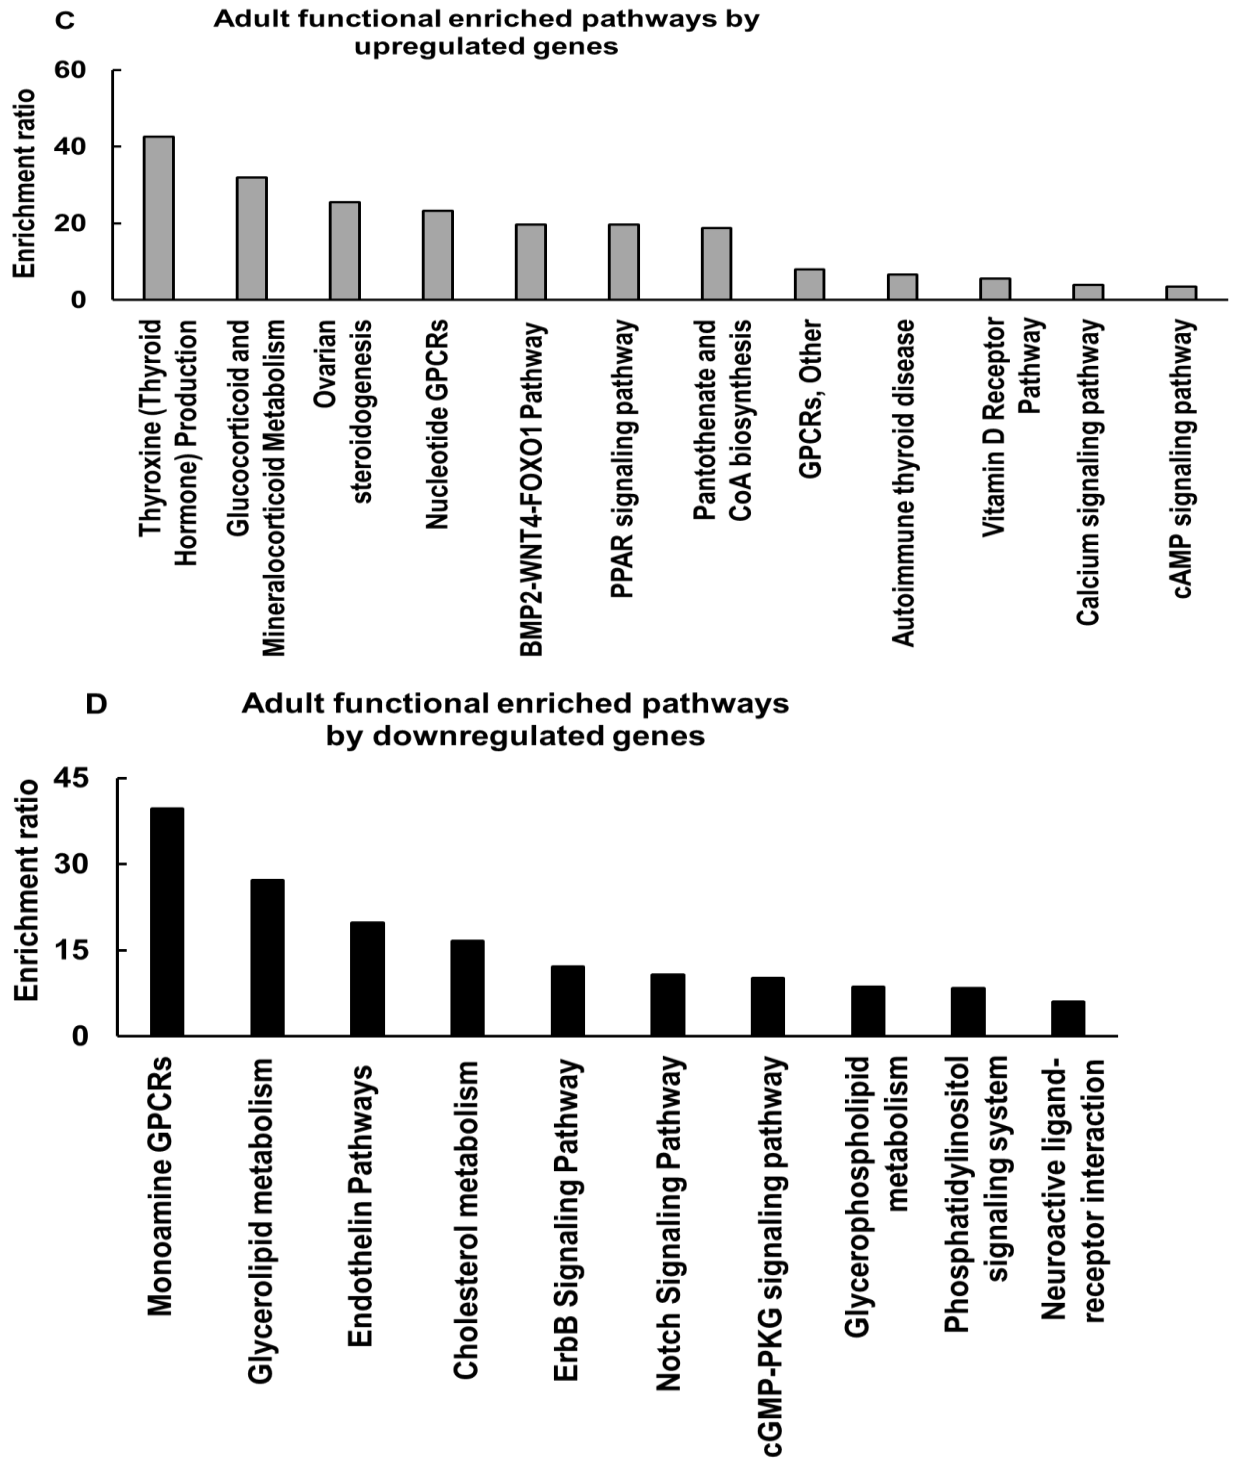

**Supplemental Fig 1.** Bioinformatic analysis of the RNA-seq data. Genes differentially expressed were evaluated *in silico* using Function Enrichment software showing upregulated and downregulated canonical pathways in fetal D90 (A, B) and adult Y2 (C, D) ovaries, respectively.
